# Supplementary material for: High Prevalence of Staphylococcus aureus Enterotoxin Gene Cluster Superantigens in Cystic Fibrosis Clinical Isolates
Source: PubMed Central journal article supplement (PMC6947208; doi:10.3390/genes10121036), 2019-12-12
Supplement: genes-10-01036-s001.pdf [file genes-10-01036-s001.pdf]

## Appendix A

### Supplemental method: Genotyping assay.

Genomic DNA was isolated from overnight cultures of *S. aureus* using commercial kits following manufacturer's instructions. PCR reactions were performed with the following oligonucleotide primers, in 5' to 3' sequence. All PCR products were < 1 kb in size.

*sea* fwd GATTCACAAAGGATATTGTTGATAAATAT, *sea* rev GTCCTTGAGCACCAAATAAATC,  
*seb* fwd GTATGATGATAATCATGTATCAGCAA, *seb* rev CGTAAGATAAACTTCAATCTTCACAT,  
*sec* fwd GAGTCAACCAGACCCCTATGCC, *sec* rev GGCCTGGTGCAGGCATC,  
*sed* fwd GCATTACTCTTTTTACTAGTTTGTA, *sed* rev CCTTGCTTGTGCATCTAATTC,  
*see* fwd CTGAATTACAAAGAAATGCTTTAAGC, *see* rev GCCTTGCTGAAGATCTA,  
*seg* fwd AATTCCCAACCCGATCCTAAAATAG, *seg* rev TCAGTGAGTATTAAGAAATACTTCCATTTTAATAC,  
*sel-h* fwd TCACATCATATGCCAAAGCAG, *sel-h* rev TAGCACCAATCACCCTTTCC,  
*sel-i* fwd CAAGGAGATATTGGTGTAGGTAAC, *sel-i* rev TTAGTACTATCTACATATGATATTTCAACATC,  
*sel-k* fwd TGGATCAATGGAAATCAACAAAA, *sel-k* rev CGGGCTACCCGAAAAATAAT,  
*sel-l* fwd CTGTTTGATGCTTGCCATTG, *sel-l* rev GCGATGTAGGTCCAGGAAC,  
*sel-m* fwd GATGTTGGAGTTTGAATCTTAGGAAC, *sel-m* rev TCAACTTTCGTCCTTATAAGATATTTCTACATC,  
*sel-n* fwd GATGTAGACAAAAATGATTTAAAGAAAAAATC,  
*sel-n* rev TTAATCTTTATATAAAAAATACATCGATATGATAATTAG,  
*sel-o* fwd AATGAAGAAAATCCTAAAATTGAGG, *sel-o* rev TTATGTAATAAATAAACATCAATATGATAGTC,  
*sel-p* fwd ACCAACCGAATCACCAGAAG, *sel-p* rev GTTCAAAAAGACACCGCCAAT,  
*sel-q* fwd GATGTAGGGGTAATCAACCTTAG, *sel-q* rev CTCTCTGCTTGACCAGTTCC,  
*sel-r* fwd TACTATGGGGAATGTTGAATCC, *sel-r* rev GGTATAAAGGGAACCAAATCC,  
*sel-s* fwd CTAACCTTGAATTGTAGGTTCC, *sel-s* rev CTCCACACA ACTATTATCAAACG,  
*sel-t* fwd TCGGGTGTACTTCTGTTTGC, *sel-t* rev GGTGATTATGTAGATGCTTGGG,  
*sel-u* fwd AAACCAGAACAATTGAATAAAGCG, *sel-u* rev TTATTTTTGGTTAAATGAACTTCTACATTAATAG,  
*sel-x* fwd TCTATGGGGGAACATTTGGA, *sel-x* rev CCGCCATCTTTTGTATTTATGA,  
*tstH* fwd GAAATTTTTCATCGTAAGCCCTTTGTTG, *tstH* rev TTCATCAATATTTATAGGTGGTTTTTCA.

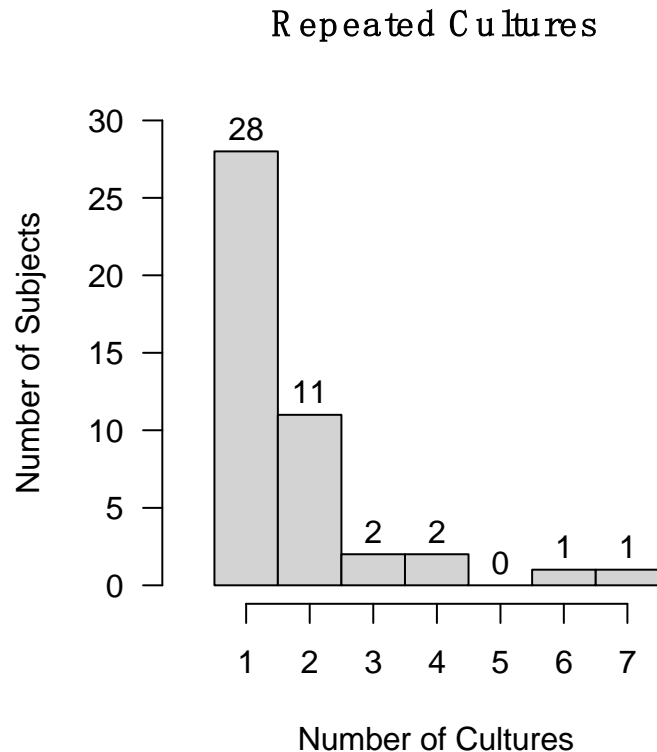

**Figure S1.** Frequency of repeated cultures within University of Iowa Biobank.
